# Supplementary material
Source: Springer Nature journal article supplement (https://www.springermedizin.de/resource/supplementary/12882_2014_825_MOESM3_ESM.pdf/9454388)

**A****Outcome Risk in the Entire Cohort**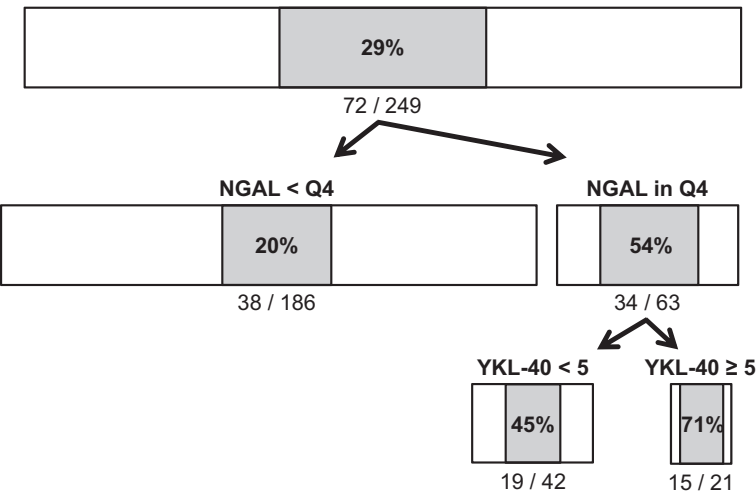**B**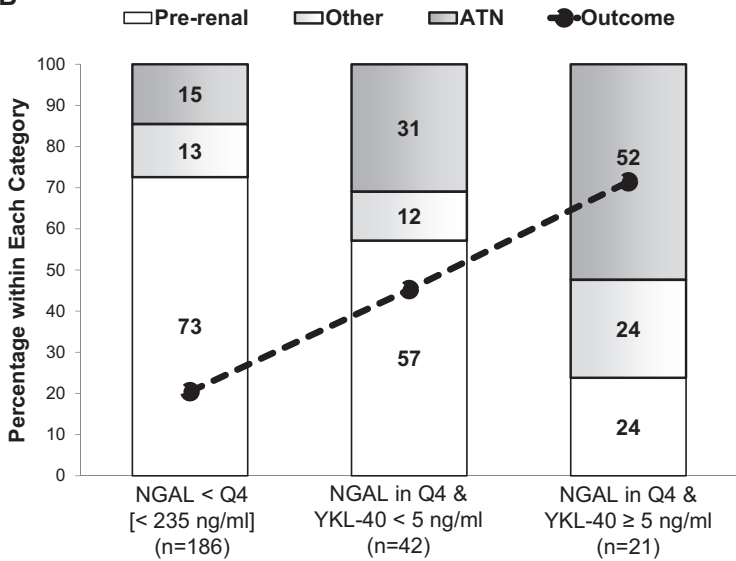

Supplement: MOESM3 [file 9454388]
